# Supplementary material
Source: Research Square preprint supplement (doi:10.21203/rs.3.rs-8791241/v1)
Supplement: Supplementary file 1 [file 26a3b6d0b1613b1a00acd19b.docx]

**Graphical Abstract**


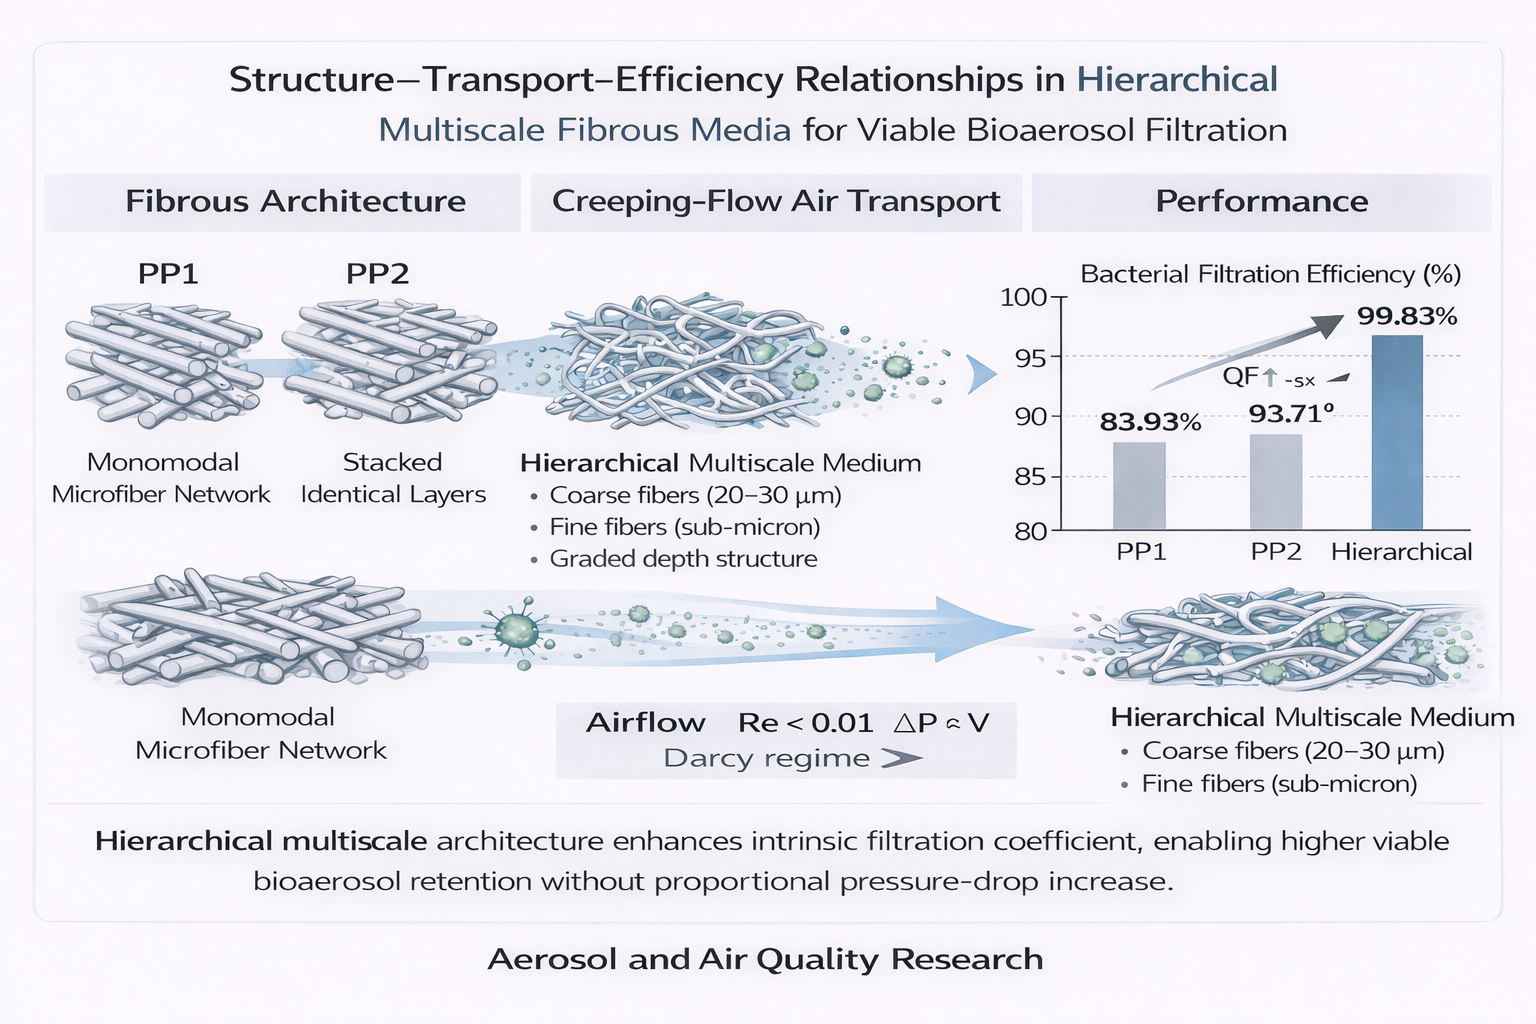


**Description:** Hierarchical multiscale fibrous architecture modifies airflow transport and particle–fiber interactions under creeping-flow conditions (Re < 0.01), enhancing viable bioaerosol capture without proportional increases in pressure drop. Compared with single-layer and stacked polypropylene media, the graded distribution of coarse and sub-micron fibers improves pore connectivity and intrinsic filtration efficiency, resulting in superior efficiency–resistance performance.
